1           **Tissue Specific Age Dependence of the Cell Receptors Involved in the SARS-CoV-2**

2                           **Infection**

3  
4     Christian V. Forst<sup>1,2,3,4,\*</sup>, Lu Zeng<sup>1</sup>, Qian Wang<sup>1,2,3</sup>, Xianxiao Zhou<sup>1,2,3</sup>, Sezen Vatansever<sup>1,2,3</sup>,  
5     Zhidong Tu<sup>1,3</sup>, Bin Zhang<sup>1,2,3,5</sup>

6  
7     <sup>1</sup>Department of Genetics and Genomic Sciences, Icahn School of Medicine at Mount Sinai, One  
8     Gustave L. Levy Place, New York, NY 10029

9  
10    <sup>2</sup>Mount Sinai Center for Transformative Disease Modeling, Icahn School of Medicine at Mount  
11    Sinai, 1470 Madison Avenue, NY10029

12  
13    <sup>3</sup>Icahn Institute for Data Science and Genomic Technology, Icahn School of Medicine at Mount  
14    Sinai, 1425 Madison Avenue, NY10029-6501, USA.

15  
16    <sup>4</sup>Department of Microbiology, Icahn School of Medicine at Mount Sinai, One Gustave L. Levy  
17    Place, New York, NY 10029

18  
19    <sup>5</sup>Department of Pharmacological Sciences, Icahn School of Medicine at Mount Sinai, 1425  
20    Madison Avenue, NY 10029

21  
22  
23    \*Corresponding author:

24  
25    Christian V. Forst, PhD  
26    Assistant Professor, Department of Genetics & Genomic Sciences, Icahn Institute of Genomics  
27    and Multiscale Biology  
28    Icahn School of Medicine at Mount Sinai  
29    1470 Madison Avenue  
30    New York, NY 10029  
31    (O) 212-824-8948  
32    Email: [christian.forst@mssm.edu](mailto:christian.forst@mssm.edu)

## 33 **Abstract**

34 The coronavirus disease 2019 (COVID-19) pandemic has affected tens of millions of  
35 individuals and caused hundreds of thousands of deaths worldwide. Due to its rapid  
36 surge, there is a shortage of information on viral behavior and host response after  
37 SARS-CoV-2 infection. Here we present a comprehensive, multiscale network analysis  
38 of the transcriptional response to the virus. We particularly focus on key-regulators, cell-  
39 receptors, and host-processes that are hijacked by the virus for its advantage. *ACE2*-  
40 controlled processes involve a key-regulator *CD300e* (a *TYROBP* receptor) and the  
41 activation of IL-2 pro-inflammatory cytokine signaling. We further investigate the age-  
42 dependency of such receptors and identify the adipose and the brain as potentially  
43 contributing tissues for the disease's severity in old patients. In contrast, several other  
44 tissues in the young population are more susceptible to SARS-CoV-2 infection. In  
45 summary, this present study provides novel insights into the gene regulatory  
46 organization during the SARS-CoV-2 infection and the tissue-specific age dependence  
47 of the cell receptors involved in COVID-19.

48

## 49 **GLOSSARY**

|    |                 |                                           |
|----|-----------------|-------------------------------------------|
| 50 | <b>BALF</b>     | Bronchoalveolar lavage fluid              |
| 51 | <b>CoV</b>      | Coronavirus                               |
| 52 | <b>COVID-19</b> | Coronavirus disease 2019                  |
| 53 | <b>CRS</b>      | Composite receptor score                  |
| 54 | <b>DEG</b>      | Differentially expressed gene             |
| 55 | <b>FC</b>       | Fold change                               |
| 56 | <b>FDR</b>      | False discovery rate                      |
| 57 | <b>FET</b>      | Fisher's exact test                       |
| 58 | <b>IFN</b>      | Interferon                                |
| 59 | <b>ISG</b>      | Interferon stimulated gene                |
| 60 | <b>NHBE</b>     | Normal human bronchial epithelial (cells) |
| 61 | <b>PRR</b>      | Pattern recognition receptor              |

62 **STSPR** SARS-CoV-2 triggered surface protein receptor  
63 **STSPR-DEAD** STSPR differential expression and age dependence (score)  
64

## 65 **Introduction**

66 On December 31, 2019, the WHO was notified about a cluster of novel  
67 pneumonia cases in Wuhan City, Hubei Province of China. The causative agent was  
68 linked to a novel by Chinese authorities on January 7, 2020, inducing the activation of  
69 the R&D Blueprint as part of WHO's response to the outbreak. Coronaviruses (CoVs)  
70 belong to the group of enveloped, single, positive-stranded RNA viruses causing mild to  
71 severe respiratory illnesses in humans<sup>1</sup>. In the past two decades, two worldwide  
72 outbreaks have originated from CoVs (SARS, MERS) capable of infecting the lower  
73 respiratory tract, resulting in heightened pathogenicity and high mortality rates<sup>2</sup>. We are  
74 currently amid a third pandemic caused by a new CoV strain, the severe acute  
75 respiratory syndrome coronavirus 2 (SARS-CoV-2), the causative agent of coronavirus  
76 disease 2019 (COVID-19). In the majority of cases, patients exhibit either no or mild  
77 symptoms, whereas in more severe cases, patients may develop severe lung injury and  
78 die from respiratory failure<sup>2,3</sup>.

79 A viral infection generally triggers a physiological response at the cellular level  
80 after the initial replication of the virus<sup>4</sup>. The cellular system has an arsenal of pattern  
81 recognition receptors (PRRs)<sup>5</sup> at its disposal that guard against various microbes inside  
82 and outside of the cell. PRRs bind distinct structural features that are conserved among  
83 different pathogens<sup>6</sup>. In a viral infection, intracellular PRRs are detecting viral RNA  
84 defective particles that are often formed during virus replication<sup>7</sup>. Pathogen detection  
85 assembles the initial steps of a signaling cascade to activate downstream transcription

86 factors, such as interferon regulator factors (IRFs) and nuclear factor kB (NF-kB)<sup>6,8</sup>,  
87 which causes the activation of two general antiviral processes<sup>6</sup>. The first, predominantly  
88 intracellular, process initiates cellular defenses via transcriptional induction of type I and  
89 III interferons (IFN-I and IFN-III, respectively). Subsequently, IFN upregulates IFN-  
90 stimulated genes (ISGs) with antiviral properties<sup>9</sup>. The second, inter-cellular cascade of  
91 antiviral counteraction refers to the recruitment and coordination of a multitude of  
92 leukocytes. Chemokine secretion<sup>10,11</sup> orchestrates this concerted action of immune-  
93 system countermeasures. The selection pressure induced by such a broad antiviral  
94 response of the host and the evolvability of viruses has resulted in countless viral  
95 countermeasures<sup>12</sup>. Thus, the host response to a virus is generally not uniform. Viral  
96 infections can cause a spectrum of various degrees of morbidity and mortality.

97       Indeed, additional factors, such as sex, age, other genetic factors, contribute to  
98 the diversity of immune response. Concerning COVID-19, age has been identified as  
99 the most significant risk factor in the mortality of patients. The overall symptomatic case  
100 fatality risk (the probability of dying after developing symptoms) of COVID-19 in Wuhan  
101 was 1.4% (0.9–2.1%) as of February 29, 2020. Compared to those aged 30–59 years,  
102 those aged below 30 and above 59 years were 0.6 (0.3–1.1) and 5.1 (4.2–6.1) times  
103 more likely to die after developing symptoms<sup>13</sup>. Similar data were reported for the  
104 United States. From February 12 to March 16, 2020, the Center for Disease Control  
105 (CDC) estimated a case-fatality rate of patients 55-64 years old with 1.4 – 2%. This rate  
106 was 10.4 – 27.3% for patients 85 years or older<sup>14</sup>.

107       To better understand the disease's molecular basis, we sought to characterize  
108 the transcriptional response to infection in both in vitro cell systems (tissue cultures and

109 primary cells) and *in vivo* samples derived from COVID-19 patients. We employed an  
110 integrative network-based approach to identify host response co-expression networks in  
111 SARS-CoV-2 infection. In particular, we investigated functional processes and key  
112 regulators affected by this specific virus, receptors used for entry, and processes  
113 hijacked for enabling viral life cycles. We further studied the age-dependence of targets,  
114 mainly receptors that the virus utilizes for entry and its life cycle.

115

## 116 **Results**

117 RNA-seq data from cell lines (NHBE, Normal Human Bronchial Epithelial cells, A549,  
118 adenocarcinomic human alveolar basal epithelial cells, and Calu-3, lung  
119 adenocarcinoma epithelial cells) and lung biopsies of two patients infected by SARS-  
120 CoV-2 were recently made available on NCBI/GEO (GSE147507)<sup>6</sup>. A second, clinical,  
121 transcriptomic dataset for a cohort of COVID-19 patients together with uninfected  
122 controls has recently been published<sup>15</sup>. Data were obtained from bronchoalveolar  
123 lavage fluid (BALF) and PBMCs (10 samples total: 3 PBMC control, 2x2 BALF infected,  
124 3 PBMC infected). RNA-seq data is available through the Beijing Institute of Genomics  
125 (BIG) Data Center (<https://bigd.big.ac.cn/>) under the accession number: CRA002390.  
126 We have combined the BALF with the lung biopsy datasets after batch correction,  
127 yielding datasets containing a total of 11 samples (6 infected and five control). These  
128 datasets were processed by an integrative network analysis approach. Data from  
129 PBMCs and cell lines were excluded. For validation purposes, we have further secured  
130 data from a second cohort of 142 patients from the NYU Langone Health Manhattan  
131 campus that required invasive mechanical ventilation<sup>16</sup>.

132

### 133 **Integrative network biology analysis of the $\beta$ -coronavirus – host system**

134 The basis of our prediction of SARS-CoV-2 processes and the host response is an  
135 integrative network analysis approach that combines network inference and network  
136 topological methods with molecular signatures. We first identified differentially  
137 expressed genes (DEGs) in each dataset that showed significant changes during  
138 SARS-CoV-2 infection. The biological functions of DEG signatures from each dataset  
139 were assessed by gene-set enrichment methods. Given the particular interest of human  
140 patients' COVID-19 response, we used a corresponding subset of transcriptome data to  
141 infer multiscale gene co-expression MEGENA networks. We ranked MEGENA network  
142 modules based on their enrichment for DEGs. MEGENA modules were functionally  
143 assessed by GO, MSigDB, and blood cell-type-specific gene-sets. We also investigated  
144 the underlying network topological structure by testing the network neighborhood of  
145 target genes for enrichment by SARS-CoV-2 DEGs and signatures responding to ACE2  
146 overexpression. Finally, we analyzed the age-dependency of molecular processes  
147 during SARS-CoV-2 infection by employing a linear regression model on baseline gene  
148 expression using Genotype-Tissue Expression (GTEx) data.

149

### 150 **Molecular signatures of SARS-CoV-2 infection**

151 We have identified 572 up-, and 1338 downregulated DEGs from patient-derived lung  
152 biopsy, as well as 3,573 up- and 1,630 downregulated DEGs from human patient BALF  
153 expression data. 2,382 DEGs are upregulated, and 2,526 DEGs are downregulated in

154 A549 cell lines (2,017 up- and 2,354 downregulated in Calu3 cell lines, resp.). The  
155 exceptions are the NHBE and the first batch (Series 2) of the A549 data (GSE147507),  
156 which yielded a fraction of significant DEGs, with 144 genes up- and 55 genes  
157 downregulated in NHBE cells as well as 88 genes up- and 14 genes downregulated in  
158 A549 (Series 2). All datasets have comparable numbers of samples. DEGs were  
159 considered significant with  $FDR \leq 0.05$  and a fold change of 1.5 or higher.

160 As others have already noted<sup>6</sup>, there is a lack of *ACE2* expression in cell line  
161 data. A key-protein relevant for SARS-CoV-2 entry as well as an ISG, *ACE2* is not  
162 significantly expressed in cell lines (S5\_A549: 3.2 fold,  $FDR = 0.15$ ; Calu3: 0.77 fold,  
163  $FDR = 0.12$ ; NHBE: 1.2 fold,  $FDR = 0.52$ ). Only in the lung biopsy (27.6 fold,  $FDR =$   
164  $3.70 \times 10^{-6}$ ) and in BALF (50.5 fold,  $FDR = 0.066$ ), we were able to identify significant  
165 expression fold change between healthy/Mock control and infection. According to GTEx  
166 data, *ACE2* baseline expression is observed in the small intestine (Terminal Ileum),  
167 female breast, thyroid, subcutaneous adipose tissue, testis, and coronary artery (**Table**  
168 **S1**). A detailed, single-cell-based study identified that *ACE2* and *TMPRSS2* are  
169 primarily expressed in bronchial transient secretory cells<sup>17</sup>. *TMPRSS2* expression is  
170 inconsistent in our datasets. It is highly upregulated in BALF (47.2 fold,  $FDR = 2.98 \times 10^{-}$   
171  $04$ ) and upregulated in Calu3 cells (2.13 fold,  $FDR = 2.71 \times 10^{-3}$ ), but downregulated in  
172 lung biopsy samples (0.16 fold,  $FDR = 8.91 \times 10^{-7}$ ). As we are mostly interested in an  
173 organismal response, our primary focus is on samples of human patients.

174 To validate our findings, we compared DEGs called during our analysis of human  
175 patients samples and results from the NYU COVID-19 study<sup>16</sup>. For this purpose, we  
176 employed Super Exact Test<sup>18</sup>, a generalization of Fisher's Exact Test to evaluate the

177 set-overlap of multiple sets. BALF and lung biopsy data show significant overlap with  
178 NYU COVID-19 data (Figure S1).

179

## 180 **Receptors, host-factors and biological processes required for the viral life cycle**

181       Given that *ACE2* is essential for SARS-CoV-2 entry<sup>19</sup>, and further, the viral life  
182 cycle, we hypothesize that *ACE2* expression may trigger other processes relevant to the  
183 viral life cycle. As we have established in the previous section that *ACE2* is indeed  
184 upregulated in human lung samples (both BALF and lung biopsy), we were interested in  
185 the effect of *ACE2* expression. To determine which receptors and targets are involved in  
186 such processes, we performed a network enrichment analysis using the *ACE2*  
187 overexpression signatures from the Blanco-Melo *et al.* dataset<sup>6</sup> and identified genes  
188 that potentially serve as novel host receptors and targets facilitating the entry of the  
189 SARS-CoV-2 into the host cell. For this purpose, we constructed a multiscale co-  
190 expression network to investigate co-expression and co-regulation relationships among  
191 genes underlying SARS-CoV-2 infection. In particular, we were interested in the  
192 organismal response from patients infected by SARS-CoV-2. Thus, we combined the  
193 available datasets from BALF and lung biopsies to construct a multiscale co-expression  
194 network of 13,398 genes and 35,483 interactions using MEGENA<sup>20</sup> (**Figure 1A**). This  
195 co-expression network includes 900 modules. The majority of the top-ranked modules  
196 (using DEGs from both patient and cell data by excluding the *ACE2* overexpression  
197 (*ACE2oe*) dataset; see methods section) are enriched for well-known biological  
198 functions related to viral infection, including cell cycle, ribosome/translation, NF- $\kappa$ B  
199 canonical pathway, or cytokine signaling. The 20 top-ranked modules are shown in



200 **Figure 1B** as a sector of a circus plot, together with information on enrichment for up  
201 and downregulated DEGs and signature sets (MSigDB, blood cells, ARCHS<sup>4</sup> tissues,  
202 and cell lines, SARS-CoV-2 life cycle genes, inflammasome, ISGs, transcription factors,  
203 miRNA targets). A few of these modules are enriched for MSigDB functions (**Figure**  
204 **1C**). As expected, we have identified a variety of cell types from the ARCHS<sup>4</sup> database  
205 accordant to the infection scenario, ranging from lung tissue and epithelial cells (**Figure**  
206 **1D**), aveolar macrophages as well as lymphocytes (**Figure 1D**). The enrichment for the  
207 two main DEG signature sets, BALF and human lung biopsy are shown in **Figures 1E**  
208 and **1F**. Although there are differences in the DEGs between these two DEG sets, we  
209 have identified common DEG enrichment in modules M2, M9, M12, M66, M68 and  
210 M400. Most of these modules are related to translation and the ribosome.

211 **Figure 2A** shows a heat map of the 30 best-ranked receptors, along with fold  
212 change (FC) of expression during SARS-CoV-2 infection in lung samples and cell lines.  
213 All the targets are members of the M2-M10-M77 branch, except for *BTK* and *THEMIS2*  
214 (M2-M8-M59 branch) and *EXOC7* and *PTPRM* (M3-M20-M203 branch). Module M10,  
215 together with ACE2oe signature genes, is shown in **Figure 2B** (**Figure S2** depicts  
216 parent module M2). As shown in **Figure 1B**, M2, M10 and M77 are highly enriched for  
217 the ACE2oe signature with FET P-value = 1.20e-95 (1.7 Fold enrichment (FE)), 1.54e-  
218 20 (2.1FE) and 7.88e-13 (2.7 FE). All three modules are further enriched for lung tissue  
219 signatures after ARCHS<sup>4</sup> tissues. Other modules such as M4, M9, M66, M69, M265,  
220 and M450 are also significantly enriched for ACE2oe signature (**Figure 2C**). M2 (rank 1)  
221 and M4 (rank 3) are the two largest modules associated with SARS-CoV-2 infection.  
222 They are associated with different biological functions such as ribosome (M2) and

223 transcription (M4) (**Table S2**). M2 and M4 are the parents of several daughter modules.  
224 For example, in addition to the modules mentioned above, M10 (rank 35, **Figure 3A**)  
225 and M77 (rank 38, **Figure 3B**), M2's daughter modules include highly ranked M7 (rank  
226 14), M9 (rank 5, **Figure 3C**), M66 (rank 4, **Figure 3D**), M68 (rank 8), M400 (rank 9),  
227 M450 (rank 12), and M1201 (rank 13). A few of these modules are enriched for MSigDB  
228 functions (**Figure 1C**). Module M7 is enriched for phenylalanine metabolism, M9 for  
229 epithelium development and IL-2 signaling, M10 developmental biology, M68 meiotic  
230 recombination, and nucleosome assembly. Although M66, M400, M450, and M1201 are  
231 best-ranked and enriched for SARS-CoV-2 signatures, they are not significantly  
232 enriched for any known biological functions. Thus, these modules potentially indicate  
233 novel biological processes relevant to COVID-19. For example, the fourth-ranked M66  
234 is driven by downregulated key regulators *DOHH*, *TMEM201* (or *SAMP1*), *TNFRSF25*,  
235 and *ZNF419*, as well as upregulated *ENTPD3* and *IFITM1* (**Figure 3D**). *TMEM201* is  
236 required for mitotic spindle assembly and  $\gamma$ -tubulin localization. The depletion of  
237 *TMEM201* results in aneuploidy phenotypes, i.e., the presence of an abnormal number  
238 of chromosomes in a cell, yielding bi-nucleated cells, and failed cytokinesis<sup>21</sup>.  
239 *TNFRSF25* is a member of the TNF-receptor family. This receptor has been shown to  
240 stimulate NF- $\kappa$ B activity and regulate cell apoptosis. *TNFRSF25* is further thought to be  
241 involved in controlling lymphocyte proliferation induced by T-cell activation. Thus, M66  
242 likely plays a role in cytokinesis and cell proliferation. Concerning M4, highly ranked  
243 sub-modules (children) are M27 (rank 6, **Figure 3E**), M265 (rank 7), M276 (rank 2,  
244 **Figure 3F**). M276, with 81 genes, includes upregulated hemoglobin subunits  $\delta$ ,  $\gamma$ 1, and  
245  $\mu$  (*HBD*, *HBG1*, *HBM*), which form part of the hemoglobin complex (FET P-value = 0.05,

246 62.1 FE). M276 is potentially responsible for oxygen transport (FET P-value = 0.089,  
247 49.7 FE). M27 and M265 are not significantly enriched for any biological function  
248 (**Figure 1A** shows the M4-M27-M276 branch).

249 The best-ranked ACE2oe network enriched targets are *CLOCK*, *CD300e*, *CD81*,  
250 *C14orf119*, and *CTSZ*. All but *C14orf119* are in the immediate network neighborhood of  
251 *CD81* (see **Figure 3F**). Clock circadian regulator (*CLOCK*) plays a central role in the  
252 regulation of circadian rhythms. *CLOCK*, a transcription factor, is upregulated in BALF  
253 and A549 samples. *CD300e* is a member of the *CD300* glycoprotein family of  
254 transmembrane cell surface proteins expressed on myeloid cells. It is upregulated in  
255 lung samples. The protein interacts with the TYRO protein tyrosine kinase binding  
256 protein (*TYROBP*) and is thought to act as an activating receptor. Activation via *CD300e*  
257 provided survival signals that prevented monocyte and Myeloid dendritic cells  
258 apoptosis, triggered the production of pro-inflammatory cytokines, and upregulated the  
259 expression of cell surface co-stimulatory molecules in both cell types<sup>22</sup>. The expression  
260 and function of human *CD300* receptors on blood circulating mononuclear cells are  
261 distinct in neonates and adults<sup>23</sup>, potentially contributing to the difference in clinical  
262 outcome after COVID-19 infection. Zenarruzabeitia *et al.* reported a stark down-  
263 regulation of *CD300e* on monocytes in patients with severe disease. However, we  
264 cannot confirm this finding in our BALF validation data. In the NYU COVID-19 study,  
265 *CD300e* is upregulated 1.6 fold in patients with severe diseases compared to patients  
266 with a mild outcome. Another ACE2oe network enriched target is *CD81*, with down-  
267 regulation in lung samples and cell-lines. *CD81* is an entry co-receptor for the Hepatitis  
268 C virus. *CD81* is the only ACE2oe target which network neighborhood is significantly

269 enriched for SARS-CoV-2 signatures, yielding a rank of 79 based on NWes.  
270 Furthermore, *CD81* is a key regulator in the M2-M10-M77 branch (**Figures S2, 3A, and**  
271 **3B**). Thus, *CD81* is potentially a novel host cell receptor that SARS-CoV-2 requires for  
272 entry and, therefore, a therapeutic target. Cathepsin Z (*CTSZ*) is a lysosomal cysteine  
273 proteinase and member of the peptidase C1 family. It is downregulated in lung samples  
274 and slightly upregulated in A549. Similar to *CD81*, *CTSZ* is a key regulator in M2-M1-  
275 M77. Singh et al., 2020 hypothesized that cathepsins are among other factors  
276 facilitating SARS-CoV-2 entry into the host cell<sup>24</sup>. The epidermal growth receptor *EGFR*  
277 is a transmembrane glycoprotein and present on the cell surface of epithelial cells. It is  
278 significantly upregulated in lung samples, A549, and Calu3 cells. *EGFR* is a host factor  
279 for hepatitis C virus entry<sup>25</sup>. Respiratory viruses induce *EGFR* activation, suppressing  
280 IFN regulatory factor (IRF) 1–induced IFN- $\lambda$ , and antiviral defense in airway  
281 epithelium<sup>26</sup>. Thus, *EGFR* may not be required for SARS-CoV-2 entry, but it may be a  
282 potential host factor for the viral life cycle.

283 We validated our findings with results derived from the NYU COVID-19 cohort.  
284 Figure S3A shows a heatmap of 20 best ranked modules enriched for DEG signatures  
285 identified in this manuscript and deduced from the NYU COVID-19 cohort. Although the  
286 majority of modules is enriched for the combined lung and BALF data set, we can  
287 identify significant enrichment for best-ranked modules, in particular, for NYU COVID-19  
288 DL and HL signatures. We further evaluated the similarity in gene content between  
289 modules from this study and modules derived from the NYU COVID-19 cohort (Figure  
290 S3B). In particular, best-ranked modules show significant overlap, validating the  
291 findings.

292 We have further investigated other cell-surface proteins, in particular cell surface  
293 receptors. For this purpose, we use data on experimentally verified high-confidence cell  
294 surface receptors from the cell surface protein atlas<sup>27</sup> and data from the in silico human  
295 surfaceome<sup>28</sup> – an extension from the protein atlas by using the measured protein data  
296 as a learning set for in silico prediction. From 2800 surface proteins, 1199 are classified  
297 as receptors by Surfaceome<sup>28</sup>, capable of transducing signals triggered by binding  
298 ligands or, hypothetically, surface proteins of the SARS-CoV-2 virion. Similar to the  
299 behavior of *ACE2*, we hypothesize that the expression of genes coding for such surface  
300 proteins can be triggered by the infection. We further hypothesize that such surface  
301 proteins mediate the transcriptomic response of downstream genes. Thus we expect  
302 up-regulation of the surface protein-coding genes and enrichment of DEGs in such  
303 receptors' network neighborhood. Out of the 1199 receptors from the Surfaceome, 413  
304 are in the MEGENA network. We identified further candidates in addition to the above-  
305 discussed surface receptors and key regulators *CD81*, *CD300E*, and *EGFR*. We  
306 expanded our criteria and included surface proteins that are significantly expressed  
307 across all datasets (employing ACAT, an aggregated Cauchy association test<sup>29</sup>).  
308 Surface proteins with the lowest aggregated P-value that are upregulated in most  
309 datasets were chosen. The highest-ranked candidate is lysosome-associated  
310 membrane glycoprotein 3 (*LAMP3*), followed by *EGFR*, as discussed above. LAMPs  
311 family plays a critical role in the autolysosome fusion process. *LAMP3* is expressed  
312 explicitly in lung tissues and is involved in influenza A virus replication in A549 cells<sup>30</sup>. It  
313 activates the PI3K/AKT pathway required for the influenza life cycle and necessary for  
314 SARS-CoV to establish infection, as demonstrated in Vero E6 cells<sup>31</sup>. Third-best ranked

315 surface protein is CEA cell adhesion molecule 1 (*CEACAM1*). Multiple cellular activities  
316 have been attributed to the encoded protein, including roles in the differentiation and  
317 arrangement of three-dimensional tissue structure, angiogenesis, apoptosis, tumor  
318 suppression, metastasis, and the modulation of innate and adaptive immune responses.  
319 Both *CEACAM1* and *LAMP3* are members of the M4-M27 branch.

320

### 321 **SARS-CoV-2 triggered surface protein receptors expression show clear tissue-** 322 **specific age-dependency**

323 We were also interested in the age-dependency of the molecular processes involved in  
324 SARS-CoV-2 infection. A significant age disparity for severe cases, often causing death,  
325 has been widely reported for COVID-19. Being highly disproportional, more elderly  
326 patients experience severe symptoms and die due to this particular disease. We  
327 hypothesize that many host factors required for the virus life cycle have an age-  
328 dependent expression. By filtering in the genes upregulated in at least two of the SARS-  
329 CoV-2 studies, we obtained 213 genes encoding cell-surface proteins. These surface  
330 proteins are involved in transmembrane transport of small molecules (MSigDB c2.cp  
331 enrichment:  $P = 3.38e-08$ , 4.3 fold), ERBB(4) network pathway ( $P = 7.46e-08$ , 5.5 fold),  
332 neuroactive ligand-receptor interaction ( $P = 8.51e-05$ , 4.7 fold) or cytokine-cytokine  
333 receptor interaction ( $P = 1.22e-04$ , 4.2 fold). The tissue-specific age-dependency of  
334 these genes' baseline expression was calculated by a linear model using data from  
335 GTEx (see **Methods**). We examined correlations between the expression of these  
336 SARS-CoV-2 triggered surface protein receptors (STSPRs) with chronological age  
337 using GTEx v8 data covering 46 tissues (**Table S3**). A large number of these surface

338 protein receptors have their gene expression levels associated with age in many  
339 tissues, especially in the tibial artery, tibial nerve, and visceral fat. More than 70  
340 receptors were significantly correlated with age. In contrast, very few receptors were  
341 associated with age in the liver, coronary artery, and brain substantia nigra (<5  
342 receptors). Moreover, in most cases, the gene expression levels of these receptors  
343 were increased with age (**Table S4**).

344 We further examined the overall correlation between STSPRSTSPRs expression  
345 and age in a tissue-specific manner. Specifically, we first computed a composite  
346 receptor score (CRS) for each tissue of each sample in GTEx by summarizing the  
347 normalized expression values of the STSPRSTSPRs and then assessed the correlation  
348 between CRS and age (see **Methods** for details; **Figure 4**). Three tissues, including the  
349 tibial artery, skeletal muscle, and subcutaneous fat, show the strongest positive  
350 correlations between their respective CRS and age. On the other hand, the whole  
351 blood, the frontal cortex (BA9), the ovary, and the cerebellum have the strongest  
352 negative correlations. Interestingly, the lung is ranked 31 out of 46 tissues, indicating  
353 that COVID-19 may impact far more tissues in different age populations than what we  
354 observed. As expected, the top-ranked tissues have a large number of significantly age-  
355 correlated receptors, consistent with the direction of the overall correlation. For  
356 example, in the tibial artery, which has a significant positive CRS-age correlation, 94  
357 STSPRSTSPRs are significantly positive, and nine STSPRSTSPRs are significantly  
358 negatively correlated with age. Whereas in the frontal cortex, 56 STSPRs are  
359 significantly negative, and two STSPRs are significantly positively correlated with age,  
360 respectively (**Figure 4A**). The age effect on various disease pathologies is known for



361 some of these tissues, with significant correlations between CRS and age. For example,  
362 age is a known risk factor for adverse outcomes in peripheral artery disease. The risk of  
363 severe limb ischemia, the sudden loss of blood flow to a limb caused by embolism or  
364 thrombosis, significantly increases with age<sup>32</sup>. Thrombosis and microvascular injury  
365 have been identified as an implication of severe COVID-19 infection<sup>33</sup>. Another example  
366 is skeletal muscles with well-studied age-related wasting and weakness. Cellular and  
367 molecular mechanisms contributing to a decline in muscular function involve  
368 neuromuscular factors, hormones, testosterone or growth hormone, insulin, myogenic  
369 regulatory factors (MRFs), the Notch signaling pathway, as well as cytokines and  
370 inflammatory pathways<sup>34</sup>. A cytokine storm and robust production of cytokines<sup>6</sup> are  
371 known to contribute to the severity of COVID-19 infections<sup>35</sup>, potentially inducing  
372 systemic effects across many tissues and organs.

373         Among the STSPRs, ectodysplasmin A2 receptor (*EDA2R*) is significantly  
374 correlated with age in 39 of the 46 tissues in GTEx analyzed here. Its gene expression  
375 level is consistently increased with age across all these tissues (**Table S5**). *EDA2R* is a  
376 TNF receptor family member associated with the Nuclear Factor Kappa B (NF-κB) and  
377 p53 signaling pathways<sup>36</sup>. *EDA2R* has been identified as a strong candidate gene for  
378 lung aging in the context of COPD with additional age association in adipose tissue,  
379 artery, heart, muscle, and skin tissue<sup>37</sup>. It is also a target of ACE2 overexpression.  
380 Among the STSPRs, *EDA2R* shows the most significant positive correlation in 24  
381 tissues in GTEx, including the tibial artery, subcutaneous fat, tibial nerve, adipose  
382 visceral (omentum), or the frontal cortex. *EDA2R* is a member of the M4-M26 module  
383 branch and key regulator in the daughter module M1602.



384 Other age-associated receptors are *SLC22A15*, *PSEN1*, *CD69*, and *ENTPD3*.  
385 *SLC22A15* is positively and negatively correlated with age in 13 and 6 tissues,  
386 respectively. It is a member of the prototypical carnitine and ergothioneine  
387 transporters<sup>38</sup> and is associated with many complex lipids that are not characteristic of  
388 any other SLC22 transporter<sup>39</sup>. *SLC22A15* facilitates tumorigenesis in colorectal cancer  
389 cells. Overexpression of *SLC22A15* leads to an increase in cell proliferation and cell  
390 colony formation capacity<sup>40</sup>. Presenilin 1 (*PSEN1*) mutations have been linked to an  
391 inherited form of Alzheimer's disease. *PSEN1* is negatively correlated with age in 16  
392 tissues but positively correlated with age in two brain tissues, the amygdala, and the  
393 hippocampus. Presenilins potentially regulate amyloid precursor protein (*APP*) by  
394 modulating gamma-secretase, an enzyme that cleaves *APP*. It is further known that the  
395 presenilins function in the cleavage of the Notch receptor. *CD69*, a member of the  
396 calcium-dependent lectin superfamily of type II transmembrane receptors, is only  
397 positively correlated with age in 17 tissues. *CD69* is an early activation marker  
398 expressed in hematopoietic stem cells, T cells, and many other cell types in the immune  
399 system. Expression of the encoded protein is induced upon activation of T lymphocytes  
400 and may play a role in proliferation. Furthermore, the protein may act to transmit signals  
401 in natural killer cells and platelets. *CD69* mRNA expression is only positively correlated  
402 with age. Thus, we would expect an increased expression with age. However, *CD69*  
403 expression and its age-dependency are controversial. CD4+ and CD8+ lymphocytes  
404 derived from elderly persons had reduced CD69 surface expression compared to young  
405 persons<sup>41</sup>. On the other hand, CD69 enhances the immunosuppressive function of  
406 regulatory T-cells in an IL-10 dependent manner<sup>42</sup>. This behavior would fit the

407 hypothesis of a compromised immune response in the elderly. Ectonucleoside  
408 triphosphate diphosphohydrolase 3 (*ENTPD3*) is another gene with age-dependent  
409 expression. Its expression is positively correlated with age in the tibial artery and  
410 skeletal muscle and negatively correlated in 14 tissues. *ENTPD3* encodes a plasma  
411 membrane-bound divalent cation-dependent E-type nucleotidase. The encoded protein  
412 is involved in regulating extracellular levels of ATP by its hydrolysis (to ADP) and other  
413 nucleotides. *ENTPD3* is a key regulator in the M2-M9-M66 branch of modules. Number  
414 4 ranked module M66 (**Figure 3D**) is enriched for macrophages/neutrophils (ARCHS<sup>4</sup>  
415 FET P-value = 0.014, 1.6 FE).

416

#### 417 **Age dependency of a systemic SARS-CoV-2 response**

418 Network neighborhoods of several STSPRs such as *ENTPD3*, *GABRP*, and  
419 *EPHA6* are enriched for the SARS-CoV-2 induced DEG signatures from human patient  
420 lung samples. The *GABRP* mRNA level is positively correlated with age in three tissues  
421 (subcutaneous fat, lung, minor salivary gland) and negatively correlated with age in  
422 three other tissues (tibial nerve, not sun-exposed skin, small intestine terminal ileum).  
423 *EPHA6*, a member of the M2-M9 branch (**Figure 1A** and **Figure 3C**), promotes  
424 angiogenesis<sup>43</sup> and regulates neuronal and spine morphology<sup>44</sup>. The network  
425 neighborhood of *EPHA6* is enriched for pentose and glucuronate interconversion,  
426 glucuronidation, and systemic lupus erythematosus (FET P-values < 7.5e-03). *EPHA6*  
427 mRNA level increases with age in six tissues (artery aorta, cerebellar brain hemisphere,  
428 brain cerebellum, esophagus gastroesophageal junction, esophagus mucosa, and  
429 ovary). It decreases in four tissues (brain amygdala, brain cortex, brain hippocampus,

430 and brain hypothalamus). Interestingly, *ACE2* mRNA level increases with age in five  
431 tissues (adrenal gland, lung, ovary, stomach, and uterus tissue) and decreases in three  
432 tissues (aorta artery, minor salivary gland, and tibial nerve) (**Table S3**).

433 We further investigated the potential age dependencies of STSPRs in biological  
434 processes realized by MEGENA co-expression modules. For this purpose, we have  
435 identified network modules enriched for tissue-specific age-correlated STSPR. The  
436 3,227 strong generic transcription module M4 is enriched for both positive and negative  
437 correlated STSPRs. M4 is enriched for positive age-correlated STSPR in prostate (FET  
438 P-value = 0.015, 1.85 FE) and for negative age-correlated STSPR in liver (FET P-value  
439 = 0.0015, 2.77 FE). We have identified the M4-M27 branch with signaling functions  
440 underlying COVID-19 (**Figure 1A** shows the M4-M27-M276 branch). Using blood cell  
441 type signatures, we found that M4 is enriched for neutrophils (FET P-value = 0.037, 3.0  
442 FE). Neutrophil-mediated innate immune responses against pathogens in the lungs  
443 determine the outcome of infection; insufficient neutrophil recruitment can lead to life-  
444 threatening infection, although an extreme accumulation of neutrophils can result in  
445 excessive lung injury associated with inflammation<sup>45</sup>. Such a massive intra-alveolar  
446 neutrophilic infiltration has been observed in COVID-19 patients with a longer clinical  
447 course, likely due to superimposed bacterial pneumonia<sup>46</sup>.

448 Other enriched modules involve number 66 ranked M26 (positive age-correlated  
449 STSPRs in adrenal gland: FET P-value = 1.32e-04, 6.88 FE), and number 35 ranked  
450 M10 (negative age-correlated STSPRs in mammary breast tissue: FET P-value = 0.069,  
451 6.10 FE). M26 is another child of M4 with cell cycle (M/G1 transition) function.

452 We also analyzed the dependence of the STSPRs on age in each tissue in the  
453 GTEx by computing correlations between differential expression of the STSPRs in  
454 COVID-19 and correlations between the STSPRs and age in each tissue in the GTEx  
455 (termed STSPR differential expression and age dependence (STSPR-DEAD) score;  
456 see details in **Methods and Table S6**). The subcutaneous fat, tibial artery, the  
457 substantia nigra, esophagus gastroesophageal junction, and liver show the strongest  
458 STSPR-DEAD score. A heatmap of STSPR-DEAD scores between 46 tissues and 7  
459 sample types is shown in **Figure 5A**. Many tissues have negative STSPR-DEAD  
460 scores. Examples are tibial artery ( $\rho = 0.32$ ,  $p=0.029$ ; **Figure 5B**), liver ( $\rho = 0.38$ ,  
461  $p=4.4e-05$ ; **Figure 5C**) and esophagus gastroesophageal junction ( $\rho = -0.39$ ,  $p=1.4e-$   
462  $03$ ; **Figure 5D**). The substantia nigra has the strongest positive STSPR-DEAD score  
463 and possesses the highest correlation coefficient in absolute terms with DEGs (DEGs  
464 from combined BALF and lung biopsies,  $\rho = -0.32$ , not shown).

465 We have further validated the dependence of the STSPRs on age in GTEx  
466 tissues with data from the NYU COVID-19 cohort. Figure S4A shows the heatmap  
467 between 46 tissues, 3 sample types, and one combined data set (Xsq), corresponding  
468 to Figure 5A. Figure S4B depicts a plot between STSPR-DEAD and DEGs of  
469 esophagus gastroesophageal junction against HL ( $\rho = -0.49$ ,  $p=3.2e-05$ ) corresponding  
470 to Figure 5D.

471 To explore the gene expression changes of STSPRs with age, we have  
472 separated GTEx donors into two cohorts: a young ( $\leq 45$  yrs) cohort and an old cohort ( $\geq$   
473 60 yrs). Gene expression was then adjusted to compare the difference between these  
474 two cohorts (see methods). In subcutaneous fat and tibial artery, the young cohort

475 showed a lower gene expression level, while a higher level of gene expression in the  
476 elder cohort. This pattern can also be seen in the esophagus gastroesophageal  
477 junction, skeletal muscle (**Figure S5**).

478 Overall, we found a clear age-effect of genes coding for cell surface proteins and  
479 receptors that are potentially utilized by SARS-CoV-2. In particular, we have identified  
480 that STSPRs showed stronger age-dependency in the tibial artery, skeletal muscle,  
481 adipose, and brain tissues. Such an age-dependent effect could potentially contribute to  
482 the elevated severity of COVID-19 in the elderly.

483

## 484 **Discussion**

485 In the present study, we focus on the biological processes and key regulators  
486 modulating the host response to SARS-CoV-2 infections. Our multiscale network  
487 analysis of the gene expression data from both patient samples and cell lines has  
488 revealed network structures and key regulators underlying the host response to SARS-  
489 CoV-2 infection.

490 Essential aspects in the COVID-19 pathology are the biological processes  
491 hijacked by the virus for its advantage. Expression of the *ACE2* receptor on the host cell  
492 and binding of the viral Spike protein for cell entry are among the first steps. Other  
493 processes beneficial for the virus may be staged by *ACE2* expression and triggered by  
494 the binding process. *CD300e* and its interacting partner *TYROBP* trigger pro-  
495 inflammatory cytokines and prevent apoptosis, an essential process controlled by many  
496 viruses. On the other hand, severe inflammation significantly contributes to the  
497 pathology of COVID-19 disease. Other potential surface protein host-factors are *CD81*

498 and *EGFR*. Additional surface proteins are *CEACAM1* and *LAMP3*. Multiple cellular  
499 activities have been attributed to *CEACAM1*, including differentiation and arrangement  
500 of three-dimensional tissue structure, angiogenesis, apoptosis, tumor suppression,  
501 metastasis, and the modulation of innate and adaptive immune responses. *LAMP3*,  
502 however, plays a critical role in the autolysosome fusion process. It activates the  
503 PI3K/AKT pathway, which is necessary for SARS-CoV to establish infection.

504 We have further investigated the age-dependence of receptors' expression as  
505 clinicians have observed a severe disparity in survival between old and young COVID-  
506 19 patients. We have identified a strong correlation between tissue age-dependency  
507 and SARS-CoV-2 infection-induced receptor expression in subcutaneous fat, tibial  
508 artery, brain substantia nigra, esophagus gastroesophageal junction, and liver.  
509 However, the exact contribution of specific receptors' age-dependency on the disease's  
510 pathology requires additional investigation. We have also identified specific genes  
511 potentially related to age-specific expression and response in SARS-CoV-2 infections.  
512 *EDA2R* expression is significantly positively correlated with age in 24 of 46 tissues in  
513 GTEx, including the tibial artery, subcutaneous fat, tibial nerve, adipose visceral  
514 (omentum), the frontal cortex, or lung. Concerning lung, *EDA2R* has been associated  
515 with aging in the context of the chronic inflammatory disease COPD<sup>37</sup>. This particular  
516 gene is another target of ACE2 overexpression, potentially affected as a response to  
517 SARS-CoV-2 infection. Other targets with age-dependent expression are *CD69*,  
518 *ENTPD3*, *EPHA6*, *GABRP*, *PSEN1*, and *SLC22A15*. Noteworthy are *CD69* and  
519 *ENTPD3*. As a surface receptor on immune cells and involved in signal transduction,  
520 *CD69* is an integral component of immune system functions. With its positive

521 correlated, age-dependent expression and its known modulation of immunosuppressive  
522 function of regulatory T-cells<sup>42</sup>, *CD69* may contribute to compromising immune  
523 response in the elderly during SARS-CoV-2 infection. The ectonucleotidase *ENTPD3*  
524 shows a protective role in intestinal inflammation<sup>47</sup> and maybe another factor of the age-  
525 dependent immune reaction during COVID-19. It is a key regulator with a network  
526 neighborhood enriched for genes responding to ACE2 overexpression.

527 In conclusion, our analyses presented here suggest that SARS-CoV-2 utilizes  
528 multiple novel receptors for entry and spawns a unique response in the host system.  
529 Novel hypotheses involving the utilization of cell surface receptors and their age-  
530 dependent expression offer new insights into the molecular mechanisms of SARS-CoV-  
531 2 infection and pave the way for developing new therapeutic intervention against  
532 COVID-19.

533

## 534 **Methods**

535 **RNAseq Analysis.** Raw reads were obtained from the Beijing Institute of Genomics  
536 (BIG) Data Center (<https://bigd.big.ac.cn/>) under the accession number CRA002390.  
537 BALF RNAseq data from healthy subjects were obtained from NCBI/SRA  
538 (SIB028/SRR10571732, SIB030/ SRR10571730, and SIB036/ SRR10571724). The  
539 RNAseq data were aligned to the Homo sapiens reference genome GRCh38/hg19  
540 using the Star aligner v2.7.0f with modified ENCODE options, according to Xiong *et*  
541 *al.*<sup>15</sup> Raw read counts were calculated using featureCounts v2.0.1. Raw read counts  
542 after Star alignment and featureCounts, as well as obtained from GSE147507, were  
543 normalized using edgeR/voom (v3.32.1 with R v4.0.0).

544 **Identification of differentially expressed genes.** We used the negative binomial  
545 models together with the empirical Bayes approach as implemented in the edgeR-  
546 package<sup>48</sup> to identify differentially expressed genes (DEGs). We considered an absolute  
547 fold change of 1.5 or higher and an FDR  $\leq 0.05$  as significant throughout the paper.

548 **Gene co-expression network analysis.** Multiscale Embedded Gene Co-Expression  
549 Network Analysis (MEGENA)<sup>20</sup> was performed to identify host modules of highly co-  
550 expressed genes in SARS-CoV-2 infection. The MEGENA workflow comprises four  
551 major steps: 1) Fast Planar Filtered Network construction (FPFNC), 2) Multiscale  
552 Clustering Analysis (MCA), 3) Multiscale Hub Analysis (MHA), 4) and Cluster-Trait  
553 Association Analysis (CTA). The total relevance of each module to SARS-CoV-2  
554 infection was calculated by using the Product of Rank method with the combined  
555 enrichment of the differentially expressed gene (DEG) signatures as implemented:  
556  $G_j = \prod_i g_{ji}$ , where,  $g_{ji}$  is the relevance of a consensus  $j$  to a signature  $i$ ; and  $g_{ji}$  is  
557 defined as  $(\max_j(r_{ji}) + 1 - r_{ji}) / \sum_j r_{ji}$ , where  $r_{ji}$  is the ranking order of the significance  
558 level of the overlap between the module  $j$  and the signature.

559 **Identification of enriched pathways and key regulators in the host modules.** To  
560 functionally annotate gene signatures and gene modules identified in this study, we  
561 performed an enrichment analysis of the established pathways and  
562 signatures—including the gene ontology (GO) categories and MSigDB—and the subject  
563 area-specific gene sets—including, Inflammasome, Interferome, and InnateDB. The hub  
564 genes in each subnetwork were identified using the adopted Fisher's inverse Chi-  
565 square approach in MEGENA; Bonferroni-corrected p-values smaller than 0.05 were set  
566 as the threshold to identify significant hubs.



567 **Network enrichment.** Fisher's Exact Test (FET) was performed to determine the  
568 overlap between network neighborhoods of potential key regulators (target) and an  
569 input DEG signature. For each target in the network in the 95 percentile of node  
570 strength after MEGENA, the genes in the network neighborhoods between one and four  
571 steps away from the target were intersected with the DEG signature. MEGENA  
572 networks were tested with DEGs of all systems for further analysis (see **the main text**).  
573 Cumulative network enrichment scores  $s = 1/n \cdot \sum_i -\log_{10} P_i$  based on individual FET  
574 P-values for each target were calculated.  $n$  is the number of realizations (i.e., the  
575 number of different neighborhoods and systems used to calculate the particular score).  
576 **GTEX data preprocessing.** We downloaded GTEX v8 data<sup>49</sup> from the Database of  
577 Genotypes and Phenotypes (dbGaP) under accession phs000424.v8.p2. For all the  
578 available tissues, we selected those with at least 80 samples and samples with more  
579 than 20 million mapped reads and greater than a 40% mapping rate. Cell line data were  
580 removed from our analysis. Only genes with expression > 0.1 Transcripts Per Million  
581 (TPM) and aligned read count of 5 or more in more than 80% samples within each  
582 tissue were used for aging gene identification. Expression measurements for each gene  
583 in each tissue were subsequently inverse-quantile normalized to the standard normal  
584 distribution to reduce the potential impact of outlier gene expression values. Our final  
585 dataset included samples from 46 tissue types. The sample size for each tissue ranged  
586 from 114 to 706, with an average of 315 samples.

587 **Linear regression model for age and sex-associated gene detection.** We  
588 implemented a linear regression model to identify age-associated gene expression (Eq.  
589 1)<sup>50</sup>.

590 
$$Y_{ij} = \beta_j + \gamma_j Age_i + \delta_j Sex_i + \sum_{k=1}^5 \mu_{jk} Genotype_{ik} + \sum_{k=1}^N \alpha_{jk} PC_{ik} + \theta_j RIN_i + \delta_j PMI_i + \varepsilon_{ij}$$

591 (Eq. 1). In this model,  $Y_{ij}$  is the expression level of gene  $j$  in sample  $i$ ,  $Age_i$  denotes the  
592 donor age of sample  $i$ ,  $Sex_i$  denotes the donor sex for sample  $i$ ,  $Genotype_{ik}$  ( $k \in$   
593  $(1,2,3,4,5)$ ) denotes the value of the  $k$ -th principal component value of the genotype  
594 profile for the  $i$ -th sample,  $PC_{ik}$  ( $k \in (1, \dots, N)$ ) denotes the value of the  $k$ -th principal  
595 component value of gene expression profile for the  $i$ -th sample,  $N$  is the total number of  
596 top PCs under consideration,  $RIN_i$  denotes the RIN score of sample  $i$ ,  $PMI_i$  denotes the  
597 PMI of sample  $i$ ,  $\varepsilon_{ij}$  is the error term,  $\gamma_j$ ,  $\delta_j$ ,  $\mu_{jk}$ ,  $\alpha_{jk}$ ,  $\theta_j$ ,  $\delta_j$  are the regression coefficients  
598 for each covariate. The corresponding correlation coefficients and p-values (adjusted  
599 with BH<sup>51</sup> method) were then calculated for all genes; FDR values < 0.05 were  
600 considered as significant age-associated genes. Several covariates (such as genotype  
601 PCs and PEER factors) we adjusted in the regression model were selected following  
602 the method used by GTEx consortium<sup>49</sup>. From the consortium's analysis, the top five  
603 genotype PCs were considered sufficient to capture the major population structure in  
604 the GTEx dataset and were used for the consortium paper.

605 **Adjust gene expression for age analysis.** We used a linear regression model to  
606 adjust gene expression (Eq. 2).  $Y_{ij} = \beta_j + \delta_j Sex_i + \mu_j Platform_i + \theta_j RIN_i + \delta_j PMI_i + \varepsilon_{ij}$

607 (Eq. 2). We regressed out the following confounding factors to obtain adjusted gene  
608 expression, which include  $Sex_i$ : the sex of donor for sample  $i$ ,  $Platform_i$ : the value of  
609 the platform for the  $i$ -th sample,  $RIN_i$ : the RIN score of sample  $i$ , and  $PMI_i$ : the PMI of  
610 sample  $i$ .

611 Expression measurements for each gene in each tissue were inverse-quantile  
612 normalized to follow the standard normal distribution to reduce the potential impact of

613 outlier gene expression values. Composite receptor score (CRS) was then calculated  
614 for each receptor in each sample (Eq.3).  $CRS(Y_i) = \sum\{sign(X_{ij}, \tau)\}$  where

615  $sign(X_{ij}, \tau) = \begin{cases} 0, & \text{if } X_{ij} < \tau \\ 1, & \text{if } X_{ij} \geq \tau \end{cases}$  (Eq. 3). In this equation,  $CRS(Y_i)$  is the composite score of

616 sample  $i$ ,  $X_{ij}$  is the expression level of gene  $j$  in sample  $i$ ,  $\tau$  is the test score. We have  
617 tested  $\tau$  with -0.25, 0, 0.25, 0.5, 0.75, and 1, spearman correlation coefficients and p-  
618 values (adjusted with BH method) were subsequently calculated between CRS score  
619 and age.  $\tau = 0.25$  showed the overall best correlation and p-value between CRS and  
620 age (**Table S6**). We termed this correlation coefficient between SARS-CoV-2 surface  
621 protein receptors (STSPRs) CRS and age, STSPR differential expression, and age  
622 dependence (STSPR-DEAD) score.

623

## 624 **Acknowledgments**

625 This work was funded by grants to CVF from the National Institutes of Health (R21  
626 AI149013).

627 The Genotype-Tissue Expression (GTEx) Project was supported by the Common Fund  
628 of the Office of the Director of the National Institutes of Health and by NCI, NHGRI,  
629 NHLBI, NIDA, NIMH, and NINDS.

630

## 631 **Author Contributions**

632 CVF and BZ conceived and designed the study. CVF, LZ, QW, ZX, and SV analyzed  
633 the data. ZT provided insights into age dependency. CVF and BZ wrote the paper.

634

635 **Competing Interests**

636 The authors declare no competing interests.

637

638 **Data Availability**

639 The datasets analyzed during the current study are available from the corresponding

640 author on reasonable request.

641

## 642 **References**

- 643 1 Cui, J., Li, F. & Shi, Z. L. Origin and evolution of pathogenic coronaviruses. *Nat Rev Microbiol* **17**,  
644 181-192, doi:10.1038/s41579-018-0118-9 (2019).
- 645 2 Daamen, A. R. *et al.* Comprehensive Transcriptomic Analysis of COVID-19 Blood, Lung, and  
646 Airway. *bioRxiv* (2020).
- 647 3 Chen, N. *et al.* Epidemiological and clinical characteristics of 99 cases of 2019 novel coronavirus  
648 pneumonia in Wuhan, China: a descriptive study. *Lancet* **395**, 507-513, doi:10.1016/S0140-  
649 6736(20)30211-7 (2020).
- 650 4 tenOever, B. R. The Evolution of Antiviral Defense Systems. *Cell host & microbe* **19**, 142-149,  
651 doi:10.1016/j.chom.2016.01.006 (2016).
- 652 5 Janeway, C. A., Jr. & Medzhitov, R. Innate immune recognition. *Annual review of immunology*  
653 **20**, 197-216, doi:10.1146/annurev.immunol.20.083001.084359 (2002).
- 654 6 Blanco-Melo, D. *et al.* Imbalanced host response to SARS-CoV-2 drives development of COVID-  
655 19. *Cell* **10** (2020).
- 656 7 Wang, C. *et al.* Cell-to-cell variation in defective virus expression and effects on host responses  
657 during influenza virus infection. *mBio* **11** (2020).
- 658 8 Hur, S. Double-Stranded RNA Sensors and Modulators in Innate Immunity. *Annual review of*  
659 *immunology* **37**, 349-375, doi:10.1146/annurev-immunol-042718-041356 (2019).
- 660 9 Lazear, H. M., Schoggins, J. W. & Diamond, M. S. Shared and Distinct Functions of Type I and  
661 Type III Interferons. *Immunity* **50**, 907-923, doi:10.1016/j.immuni.2019.03.025 (2019).
- 662 10 Proudfoot, A. E. Chemokine receptors: multifaceted therapeutic targets. *Nature reviews.*  
663 *Immunology* **2**, 106-115, doi:10.1038/nri722 (2002).
- 664 11 Sokol, C. L. & Luster, A. D. The chemokine system in innate immunity. *Cold Spring Harb Perspect*  
665 *Biol* **7**, doi:10.1101/cshperspect.a016303 (2015).
- 666 12 Garcia-Sastre, A. Ten Strategies of Interferon Evasion by Viruses. *Cell host & microbe* **22**, 176-  
667 184, doi:10.1016/j.chom.2017.07.012 (2017).
- 668 13 Wu, J. T. *et al.* Estimating clinical severity of COVID-19 from the transmission dynamics in  
669 Wuhan, China. *Nature medicine* **26**, 506-510 (2020).
- 670 14 Covid, C. & Team, R. Severe outcomes among patients with coronavirus disease 2019 (COVID-  
671 19)—United States, February 12–March 16, 2020. *MMWR Morb Mortal Wkly Rep* **69**, 343-346  
672 (2020).
- 673 15 Xiong, Y. *et al.* Transcriptomic characteristics of bronchoalveolar lavage fluid and peripheral  
674 blood mononuclear cells in COVID-19 patients. *Emerg Microbes Infect* **9**, 761-770,  
675 doi:10.1080/22221751.2020.1747363 (2020).
- 676 16 Sulaiman, I. *et al.* Microbial signatures in the lower airways of mechanically ventilated COVID19  
677 patients associated with poor clinical outcome. *medRxiv*, doi:10.1101/2021.02.23.21252221  
678 (2021).
- 679 17 Lukassen, S. *et al.* SARS-CoV-2 receptor ACE2 and TMPRSS2 are primarily expressed in bronchial  
680 transient secretory cells. *The EMBO journal*, e105114, doi:10.15252/embj.20105114 (2020).
- 681 18 Wang, M., Zhao, Y. & Zhang, B. Efficient Test and Visualization of Multi-Set Intersections.  
682 *Scientific reports* **5**, 16923, doi:10.1038/srep16923 (2015).
- 683 19 Hoffmann, M. *et al.* SARS-CoV-2 cell entry depends on ACE2 and TMPRSS2 and is blocked by a  
684 clinically proven protease inhibitor. *Cell* (2020).
- 685 20 Song, W. M. & Zhang, B. Multiscale Embedded Gene Co-expression Network Analysis. *PLoS*  
686 *computational biology* **11**, e1004574, doi:10.1371/journal.pcbi.1004574 (2015).

- 687 21 Larsson, V. J., Jafferli, M. H., Vijayaraghavan, B., Figueroa, R. A. & Hallberg, E. Mitotic spindle  
688 assembly and gamma-tubulin localisation depend on the integral nuclear membrane protein  
689 Samp1. *Journal of cell science* **131**, doi:10.1242/jcs.211664 (2018).
- 690 22 Brckalo, T. *et al.* Functional analysis of the CD300e receptor in human monocytes and myeloid  
691 dendritic cells. *European journal of immunology* **40**, 722-732, doi:10.1002/eji.200939468 (2010).
- 692 23 Zenarruzabeitia, O. *et al.* The expression and function of human CD300 receptors on blood  
693 circulating mononuclear cells are distinct in neonates and adults. *Scientific reports* **6**, 32693  
694 (2016).
- 695 24 Singh, M., Bansal, V. & Feschotte, C. A single-cell expression map of human coronavirus entry  
696 factors. *bioRxiv*, 2020.2005.2008.084806, doi:10.1101/2020.05.08.084806 (2020).
- 697 25 Lupberger, J. *et al.* EGFR and EphA2 are host factors for hepatitis C virus entry and possible  
698 targets for antiviral therapy. *Nature medicine* **17**, 589 (2011).
- 699 26 Ueki, I. F. *et al.* Respiratory virus-induced EGFR activation suppresses IRF1-dependent interferon  
700  $\lambda$  and antiviral defense in airway epithelium. *Journal of Experimental Medicine* **210**, 1929-1936  
701 (2013).
- 702 27 Bausch-Fluck, D. *et al.* A mass spectrometric-derived cell surface protein atlas. *PLoS one* **10**  
703 (2015).
- 704 28 Bausch-Fluck, D. *et al.* The in silico human surfaceome. *Proceedings of the National Academy of*  
705 *Sciences* **115**, E10988-E10997 (2018).
- 706 29 Liu, Y. *et al.* ACAT: A Fast and Powerful p Value Combination Method for Rare-Variant Analysis in  
707 Sequencing Studies. *American journal of human genetics* **104**, 410-421,  
708 doi:10.1016/j.ajhg.2019.01.002 (2019).
- 709 30 Zhou, Z. *et al.* Lysosome-associated membrane glycoprotein 3 is involved in influenza A virus  
710 replication in human lung epithelial (A549) cells. *Virology journal* **8**, 384 (2011).
- 711 31 Mizutani, T., Fukushi, S., Saijo, M., Kurane, I. & Morikawa, S. JNK and PI3k/Akt signaling  
712 pathways are required for establishing persistent SARS-CoV infection in Vero E6 cells. *Biochimica*  
713 *et Biophysica Acta (BBA)-Molecular Basis of Disease* **1741**, 4-10 (2005).
- 714 32 Domenick, N. *et al.* Impact of gender and age on outcomes of tibial artery endovascular  
715 interventions in critical limb ischemia. *Ann Vasc Surg* **26**, 937-945,  
716 doi:10.1016/j.avsg.2011.12.010 (2012).
- 717 33 Magro, C. *et al.* Complement associated microvascular injury and thrombosis in the  
718 pathogenesis of severe COVID-19 infection: a report of five cases. *Translational Research* (2020).
- 719 34 Ryall, J. G., Schertzer, J. D. & Lynch, G. S. Cellular and molecular mechanisms underlying age-  
720 related skeletal muscle wasting and weakness. *Biogerontology* **9**, 213-228 (2008).
- 721 35 Shi, Y. *et al.* COVID-19 infection: the perspectives on immune responses. *Cell death and*  
722 *differentiation* **27**, 1451-1454, doi:10.1038/s41418-020-0530-3 (2020).
- 723 36 Verhelst, K. *et al.* XEDAR activates the non-canonical NF-kappaB pathway. *Biochemical and*  
724 *biophysical research communications* **465**, 275-280, doi:10.1016/j.bbrc.2015.08.019 (2015).
- 725 37 de Vries, M. *et al.* Lung tissue gene-expression signature for the ageing lung in COPD. *Thorax*,  
726 doi:10.1136/thoraxjnl-2017-210074 (2017).
- 727 38 Engelhart, D. C. *et al.* Systems biology analysis reveals eight SLC22 transporter subgroups,  
728 including OATs, OCTs, and OCTNs. *International journal of molecular sciences* **21**, 1791 (2020).
- 729 39 Long, T. *et al.* Whole-genome sequencing identifies common-to-rare variants associated with  
730 human blood metabolites. *Nature genetics* **49**, 568-578 (2017).
- 731 40 Zhu, G. *et al.* O-GlcNAcylation of YY1 stimulates tumorigenesis in colorectal cancer cells by  
732 targeting SLC22A15 and AANAT. *Carcinogenesis*, doi:10.1093/carcin/bgz010 (2019).

- 733 41 Schindowski, K., Frohlich, L., Maurer, K., Muller, W. E. & Eckert, A. Age-related impairment of  
734 human T lymphocytes' activation: specific differences between CD4(+) and CD8(+) subsets.  
735 *Mech Ageing Dev* **123**, 375-390, doi:10.1016/s0047-6374(01)00396-7 (2002).
- 736 42 Yu, L. *et al.* CD69 enhances immunosuppressive function of regulatory T-cells and attenuates  
737 colitis by prompting IL-10 production. *Cell death & disease* **9**, 1-14 (2018).
- 738 43 Li, S. *et al.* EphA6 promotes angiogenesis and prostate cancer metastasis and is associated with  
739 human prostate cancer progression. *Oncotarget* **6**, 22587 (2015).
- 740 44 Das, G. *et al.* EphA5 and EphA6: regulation of neuronal and spine morphology. *Cell & bioscience*  
741 **6**, 48 (2016).
- 742 45 Craig, A., Mai, J., Cai, S. & Jeyaseelan, S. Neutrophil recruitment to the lungs during bacterial  
743 pneumonia. *Infect Immun* **77**, 568-575, doi:10.1128/IAI.00832-08 (2009).
- 744 46 Tian, S. *et al.* Pathological study of the 2019 novel coronavirus disease (COVID-19) through  
745 postmortem core biopsies. *Modern Pathology*, 1-8 (2020).
- 746 47 Vuerich, M., Robson, S. C. & Longhi, M. S. Ectonucleotidases in intestinal and hepatic  
747 inflammation. *Frontiers in immunology* **10**, 507 (2019).
- 748 48 Smyth, G. K. Linear models and empirical bayes methods for assessing differential expression in  
749 microarray experiments. *Statistical applications in genetics and molecular biology* **3**, Article3,  
750 doi:10.2202/1544-6115.1027 (2004).
- 751 49 Consortium, G. T. *et al.* Genetic effects on gene expression across human tissues. *Nature* **550**,  
752 204-213, doi:10.1038/nature24277 (2017).
- 753 50 Zeng, L. *et al.* Transcriptome analysis reveals the difference between "healthy" and "common"  
754 aging and their connection with age-related diseases. *Aging Cell* **19**, e13121,  
755 doi:10.1111/accel.13121 (2020).
- 756 51 Benjamini, Y. & Hochberg, Y. Controlling the False Discovery Rate - a Practical and Powerful  
757 Approach to Multiple Testing. *Journal of the Royal Statistical Society Series B-Statistical*  
758 *Methodology* **57**, 289-300 (1995).
- 759 52 Lachmann, A. *et al.* Massive mining of publicly available RNA-seq data from human and mouse.  
760 *Nature communications* **9**, 1-10 (2018).

761



762

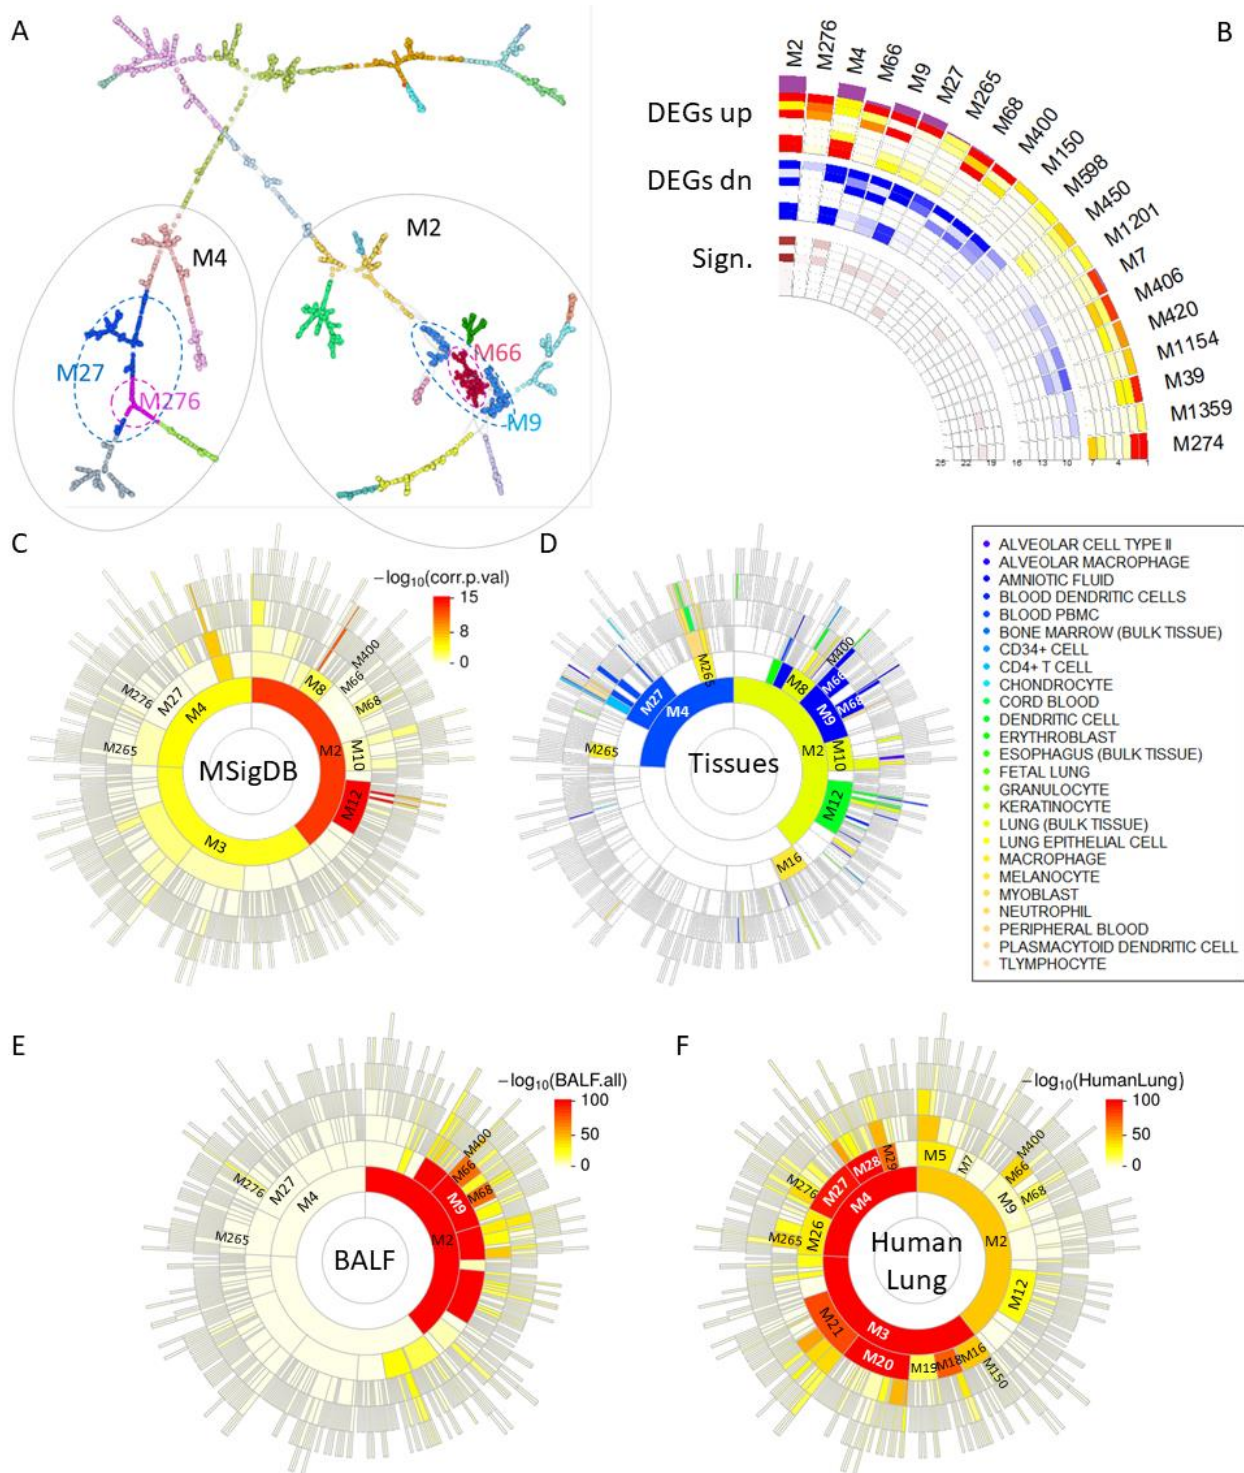

763

764

765 **Figure 1. Gene co-expression modules associated with SARS-CoV-2 infection.**

766 (A) A global MEGENA network. Different colors represent the modules at one particular

767 compactness scale. (B) The top 20 MEGENA modules most enriched for the SARS-

768 CoV-2 up- and downregulated DEG signatures are shown (outer rings: “DEGs up” and

“DEGs dn,” resp.). The center rings (“Sign.,”) show additional signatures, including



769 biological processes, cells, and tissues, as well as SARS-CoV-2 host factors based on  
770 PPI. (C) A Sunburst plot of all 934 modules enriched for MSigDB canonical processes  
771 (C2.CP) is shown. (D) The module enrichment for 25 lung pathology-related tissue  
772 signatures after the “ARCHS<sup>4</sup>” database<sup>52</sup> is depicted. (E, F) Sunburst plots of module  
773 enrichment for DEGs concerning (E) BALF and (F) lung biopsy tissues are displayed.  
774 The color bars in (C, E, and F) show the negative decadic logarithm of the adjusted P-  
775 values.  
776

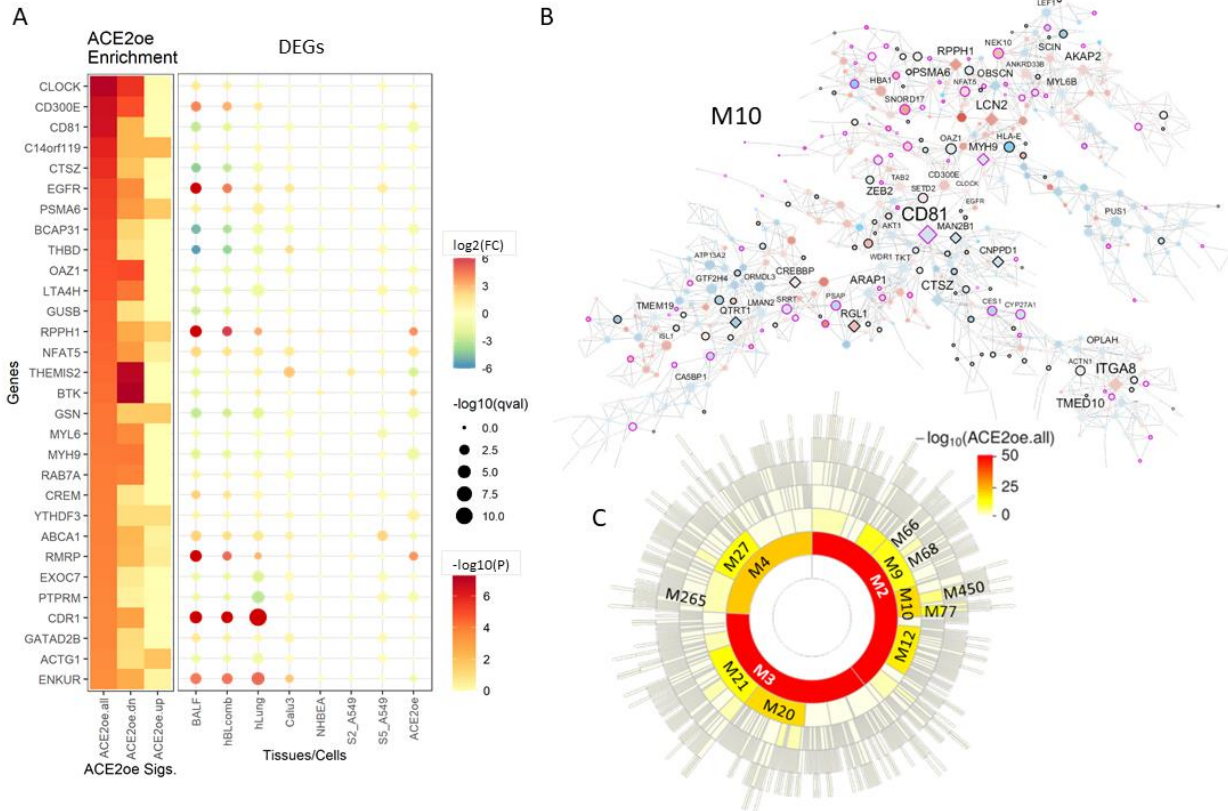

777  
778 **Figure 2. Network neighborhood and network enrichment for gene signatures and**  
779 **key regulators.**

780 (A) Top-scored targets after network enrichment by ACE2 overexpression signatures  
781 together with their directional response are shown. Many of these targets are members  
782 of M10 (B). The color tiles refer to network enrichment scores. The “ $-\log_{10}(P)$ ” color  
783 scale on the right refers to the cumulative P-value used for ranking. Dark red color  
784 denotes a higher rank. The bubble plot denotes up- (red) and downregulated (blue)  
785 genes. The color of the circles refers to the fold change of expression between virus-  
786 infected and mock-infected samples. The size indicates the FDR as  $-\log_{10}(\text{qval})$ . (C)  
787 The number 35 ranked module M10 is depicted, which is significantly enriched for  
788 ACE2oe signatures. The node color indicates a directional response. Red nodes are  
789 upregulated, blue nodes are downregulated after infection. Diamond-shaped nodes  
790 indicate key regulators. The nodes with a black border denote genes significantly  
791 responding to ACE2 overexpression with fold change (FC) of 1.5 or higher. Purple  
792 borders indicate ACE2oe responding genes with  $\text{FC} \geq 2$ . (E) A sunburst plot of the  
793 modules with ACE2oe enrichment is shown.  
794

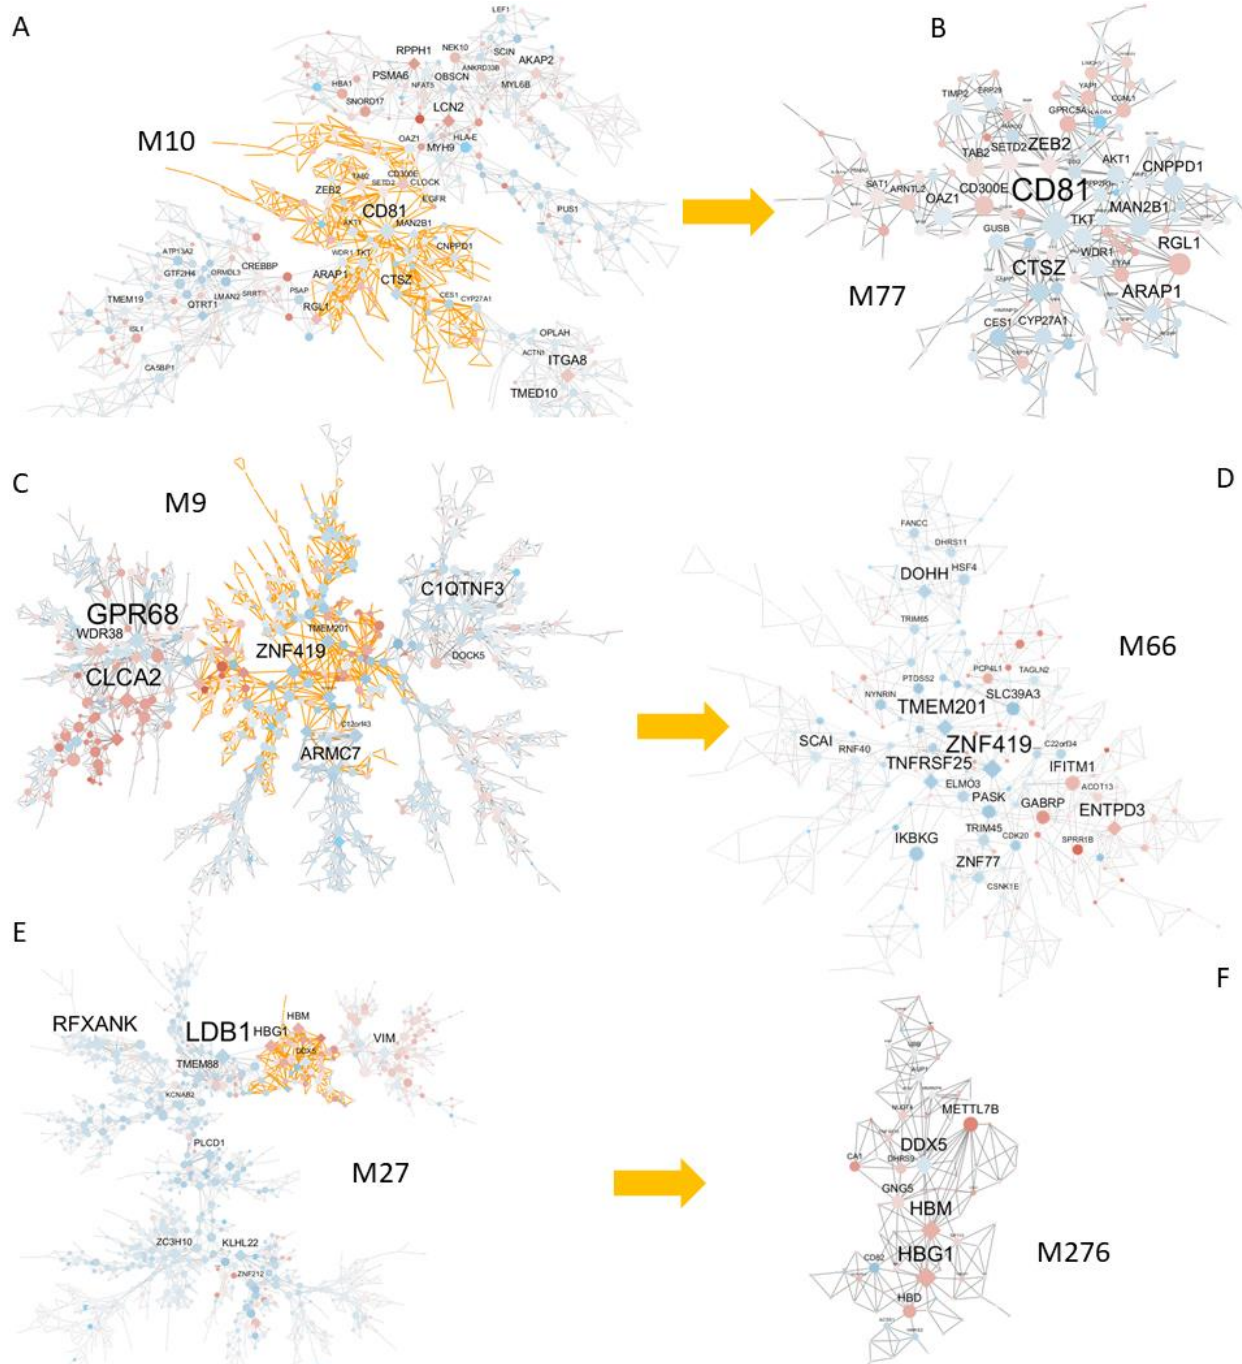

795  
796  
797  
798  
799  
800  
801  
802  
803  
804

**Figure 3. Gene co-expression modules associated with SARS-CoV-2 infection.**

(A) With rank 35, M10 is not among the best 20 ranked modules. It is potentially responsible for cellular stress response/Golgi apparatus/antigen processing and presentation and is enriched for DEGs, ACE2oe, and bulk lung tissue signatures. (B) Number 38 ranked module M77 is a daughter module of M10. M77 potentially functions for the regulation of cell adhesion. Like its parent module M10, M77 is enriched for DEGs, ACE2oe, and bulk lung tissue signatures. (C) M9 is the parent of M66 and ranked number 5, and is enriched for DEGs and ACE2oe signatures. Similar to M66, it is enriched for macrophages/neutrophils tissue signature. (D) Ranked fourth and

805 second-ranked module with less than 100 genes is M66, which is enriched for DEGs  
806 and ACE2oe signatures. M66 is enriched for macrophages/neutrophils ARCHS<sup>4</sup>  
807 signature. (E) M27 is the parent of M276 and ranked sixth. It is enriched for DEGs,  
808 ACE2oe, and blood PBMC signatures. (F) The top-ranked module with less than 1000  
809 genes, M276, is highly enriched for upregulated DEGs. M276 is among the smallest  
810 top-ranked modules with 81 genes. – Node colors refer to the direction of regulation.  
811 Upregulated genes are red, and downregulated genes are blue. Diamond-shaped  
812 nodes denote key regulators. The size of the nodes refers to the connectivity in the  
813 network. (A, C, E) The subnetworks with orange edges refer to the corresponding  
814 daughter modules shown in (B, D, F).  
815

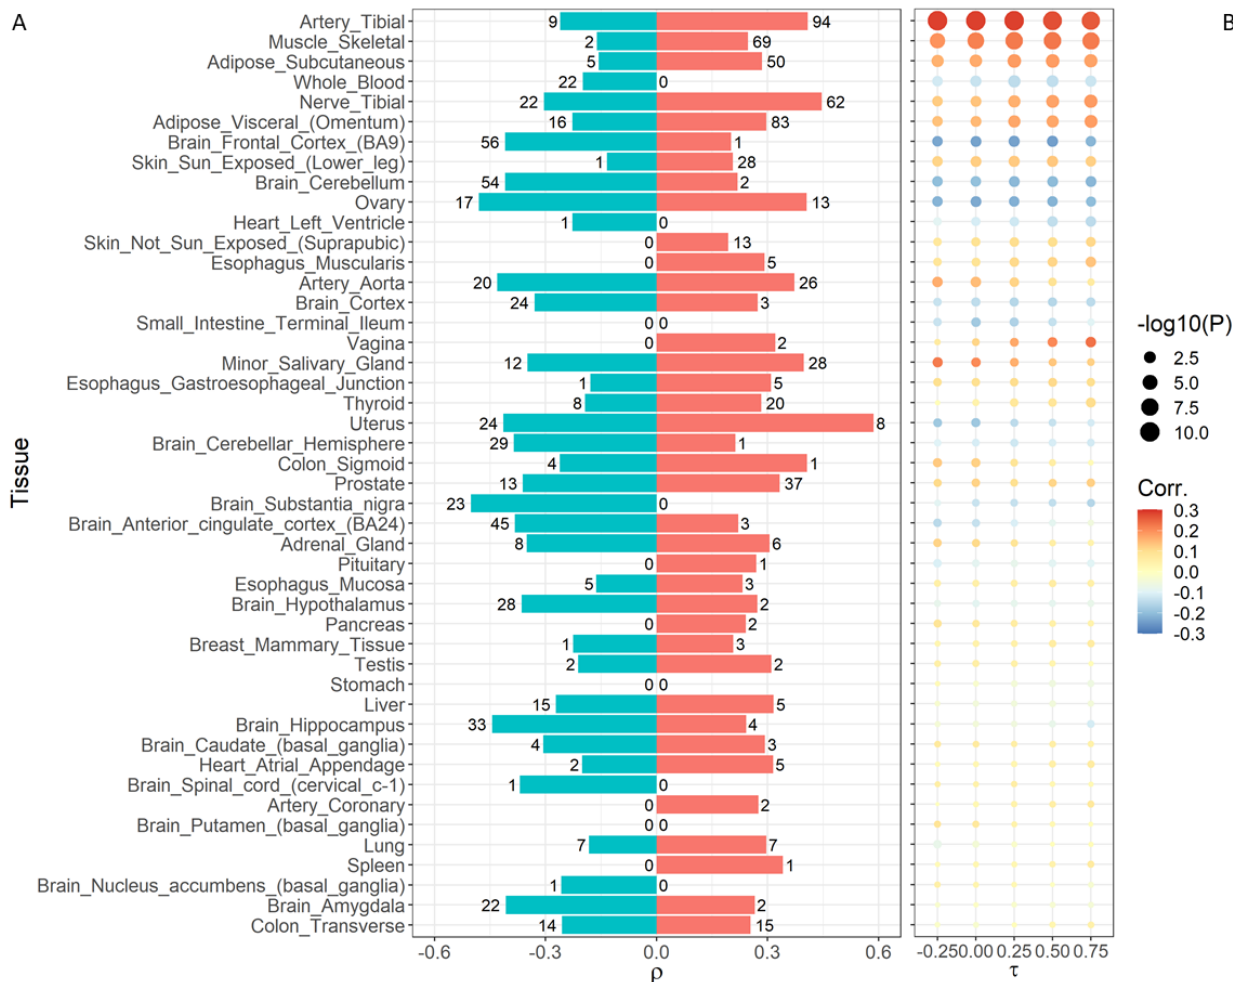

816  
817  
818  
819  
820  
821  
822  
823  
824  
825  
826  
827  
828

**Figure 4. The number of receptors significantly correlated with age in the GTEx data.**

(A) The range of significant individual receptor/age correlation  $\rho$  is shown for each tissue. Numbers next to the bars denote the number of receptors that are significantly positively (red bars) or negatively (green bars) associated with age, respectively. Missing bars indicate the absence of a significant correlation. (B) The age dependency of gene expression between tissues and composite receptor score (CRS) based on the genes coding for cell surface proteins (rows) are shown. Tissues are ranked based on correlation significance with parameter  $\tau = 0.25$ . Colors refer to the positive (red) and the negative (blue) correlation between age and CRS. The size denotes the FDR in  $-\log_{10}(\text{adj. P-Value})$ .



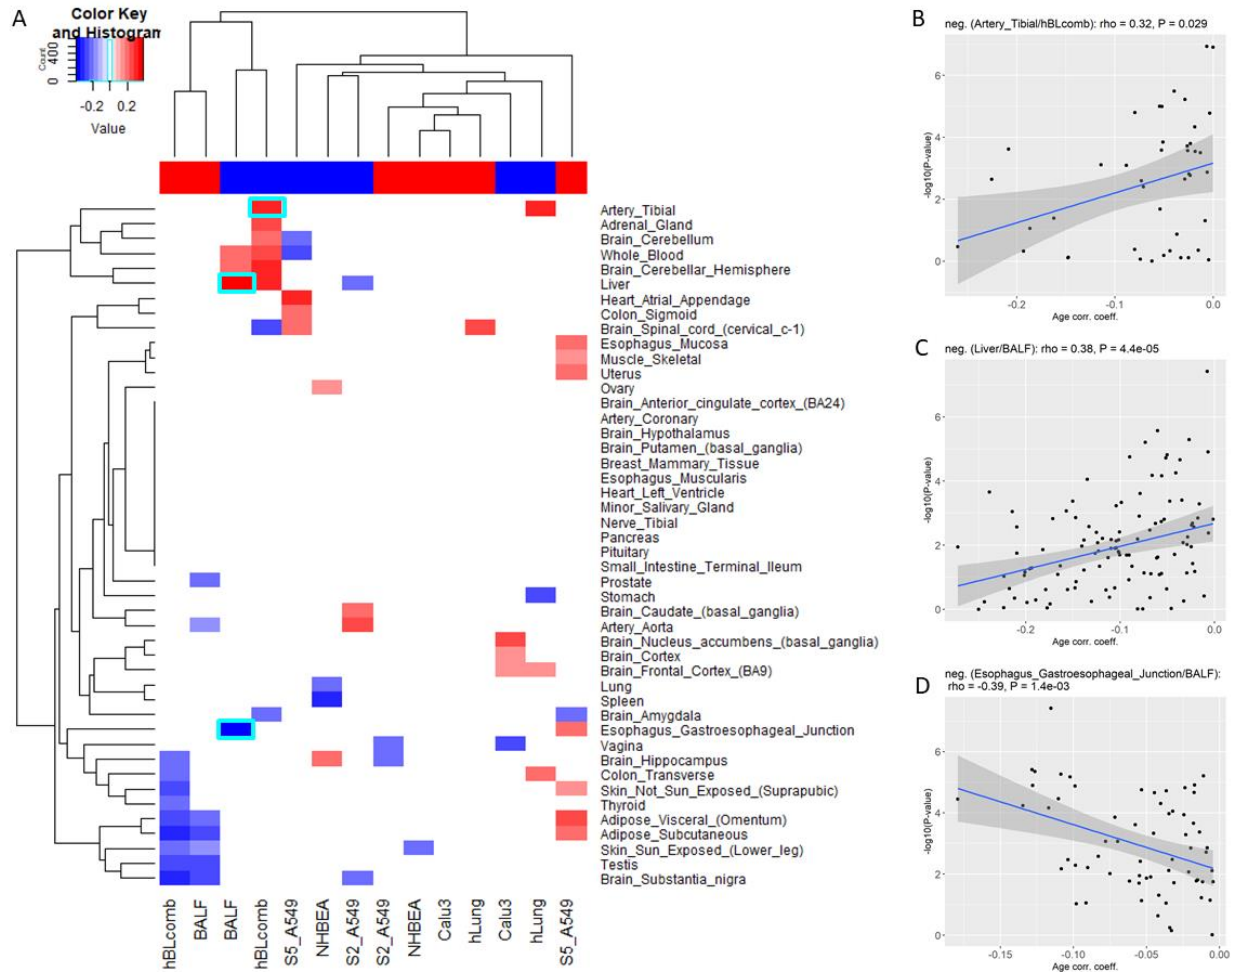

829  
830  
831  
832  
833  
834  
835  
836  
837  
838  
839  
840  
841

**Figure 5. Correlation between the surface receptors' differential expression in SARS-Cov-2 infection and their tissue-specific age dependence.**

(A) A heatmap of correlation coefficients after tissue age effect (STSPR-DEAD, see text) and DEGs correlation is shown. Only the correlation coefficients with nominal  $P \leq 0.05$  are shown. The top color bar indicates the direction of the STSPR-DEADs, with red denoting positive STSPR-DEADs and blue referring to negative STSPR-DEADs. Tiles with cyan boundary indicate select tissue/DEG pairs. (B-D) Dot plots between STSPR-DEAD and DEGs of select tissues with best correlation coefficients are shown: (B) Artery tibia against combined BALF/lung biopsy DEGs, (C) Liver against BALF, and (D) Esophagus Gastroesophageal Junction against BALF.
